# Supplementary material
Source: publisher figshare collection journal article supplement (https://acs.figshare.com/ndownloader/files/23743738)
Supplement: Supplementary file 1 [file 23743738]

**SUPPORTING INFORMATION**

**Elucidating the Molecular Interactions of  
Encapsulated Doxorubicin within a Nonionic,  
Thermoresponsive Polyester Coacervate**

*Mangaldeep Kundu<sup>†</sup>, Daniel L. Morris<sup>‡</sup>, Megan A. Cruz<sup>†</sup>, Toshikazu Miyoshi<sup>†</sup>, Thomas C.*

*Leeper<sup>§</sup>, and Abraham Joy<sup>\*†</sup>*

<sup>†</sup>Department of Polymer Science, The University of Akron, Akron, Ohio 44325, United States

<sup>‡</sup>Department of Chemistry and Biochemistry, The University of Akron, Akron, Ohio 44325,  
United States

<sup>§</sup>College of Science and Mathematics, Kennesaw State University, Kennesaw, Georgia 30144,  
United States

\*Email: [abraham@uakron.edu](mailto:abraham@uakron.edu)

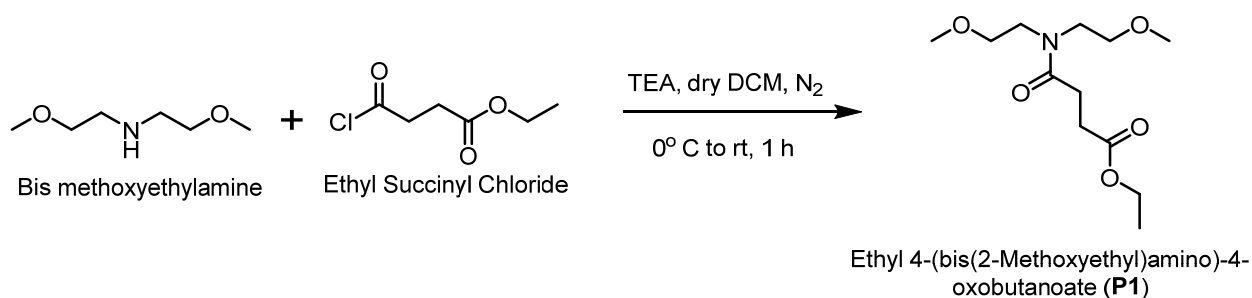

**Scheme S1:** Synthetic route of Ethyl 4-(bis(2-Methoxyethyl)amino)-4-oxobutanoate (bMoEtSA) (**P1**).

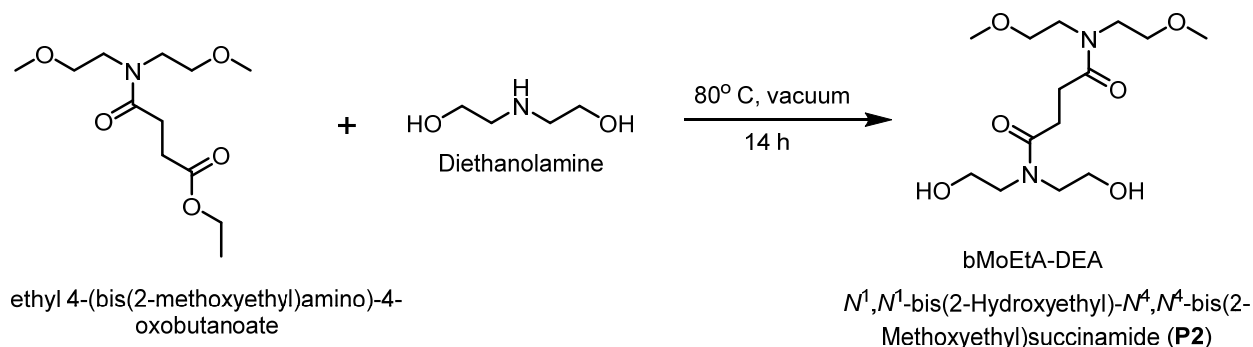

**Scheme S2:** Synthetic route of  $N^1,N^1$ -bis(2-Hydroxyethyl)- $N^4,N^4$ -bis(2-Methoxyethyl)succinamide (bMoEtDEA) (**P2**).

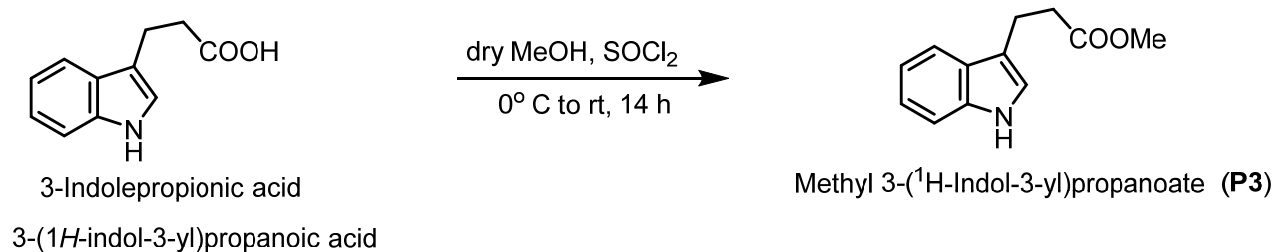

**Scheme S3:** Synthetic route of Methyl 3-( $^1\text{H-Indol-3-yl}$ )propanoate (**P3**).

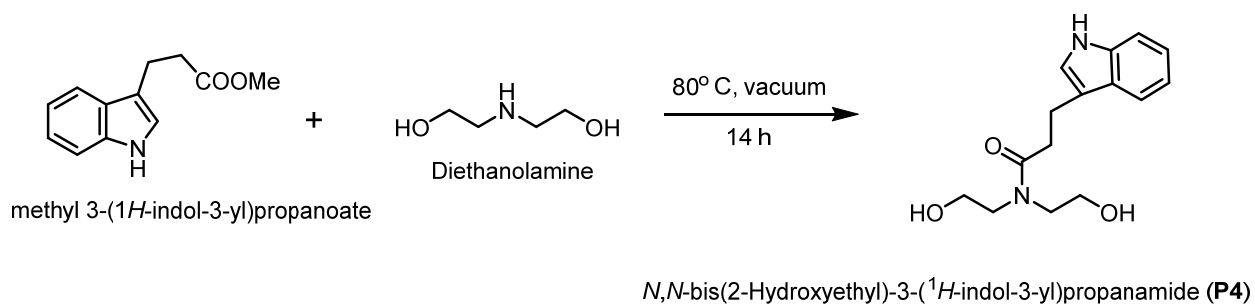

**Scheme S4:** Synthetic route of *N,N*-bis(2-Hydroxyethyl)-3-(1*H*-indol-3-yl)propanamide (**P4**).

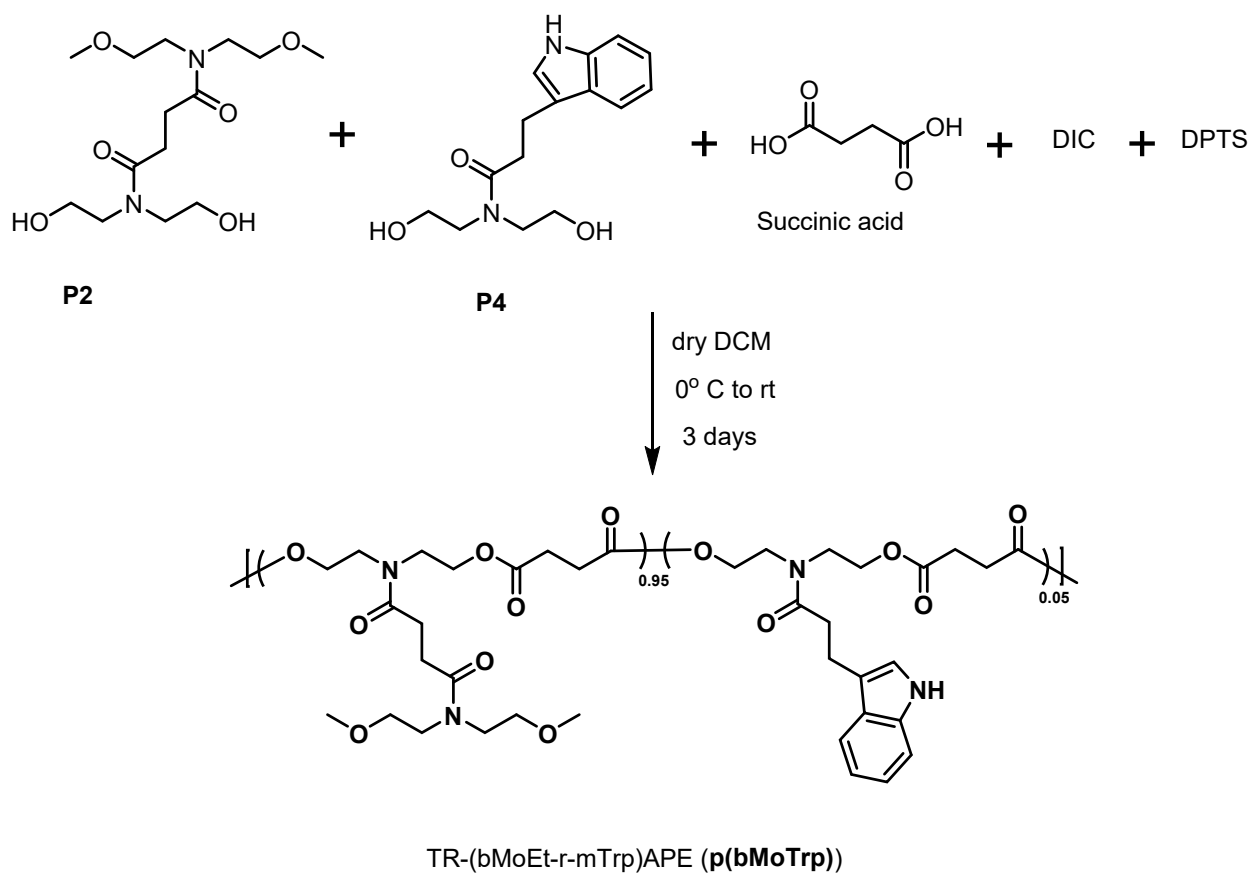

**Scheme S5:** Synthetic route of thermoresponsive polymer (TR-(bMoEt-r-mTrp)APE (**p(bMoTrp)**)).

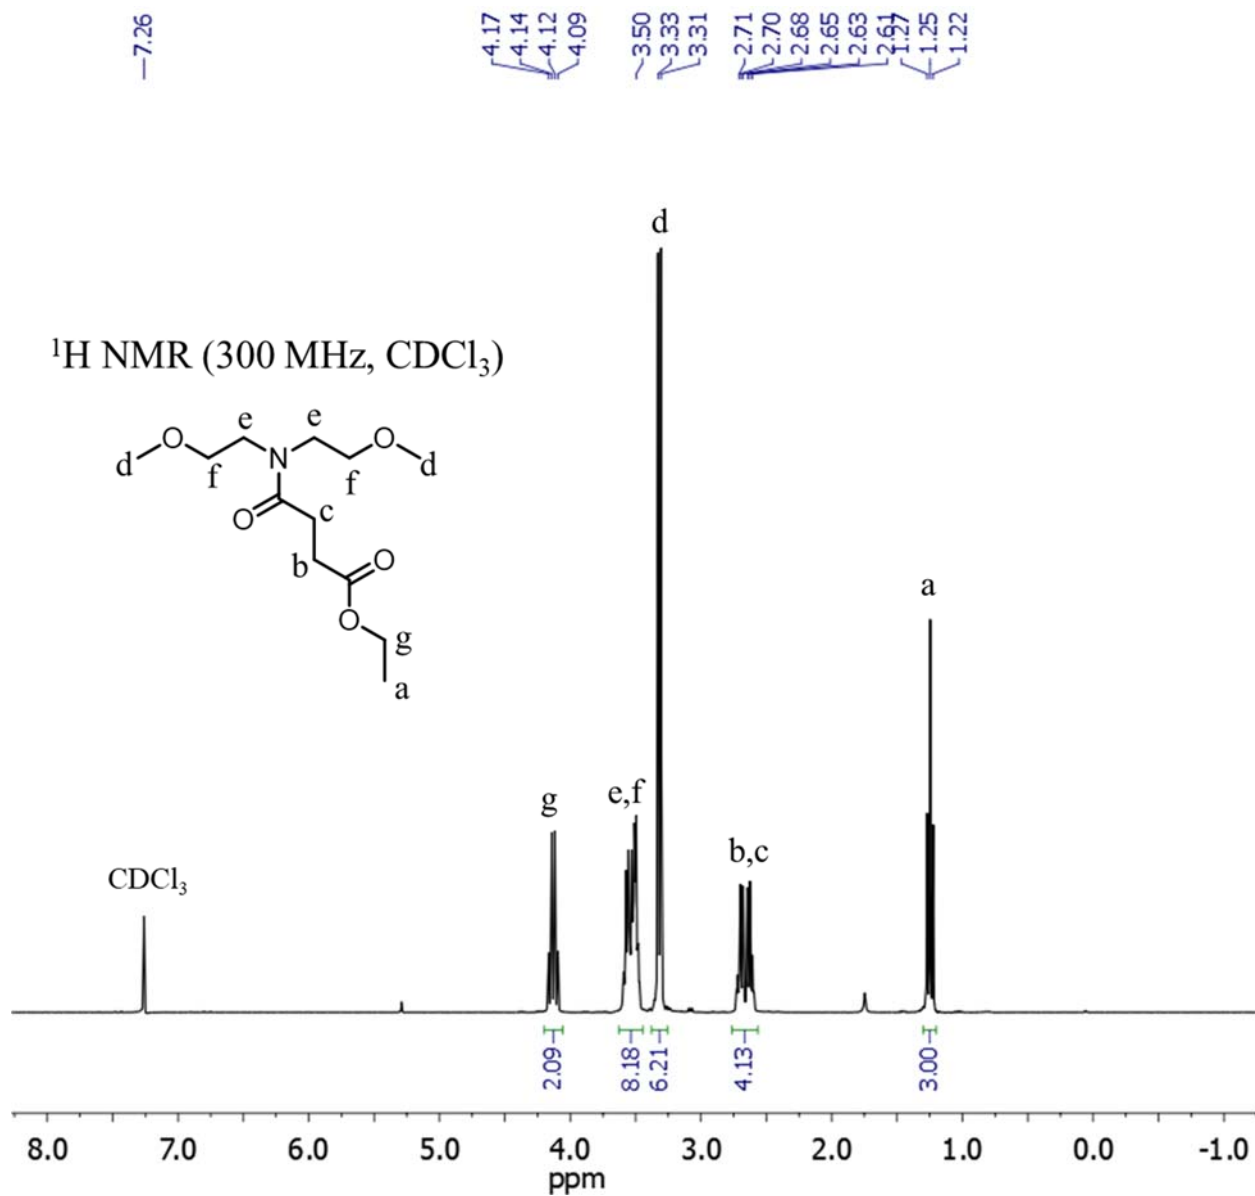

**Figure S1.** <sup>1</sup>H NMR spectrum of **P1** (in CDCl<sub>3</sub>, 300 MHz).

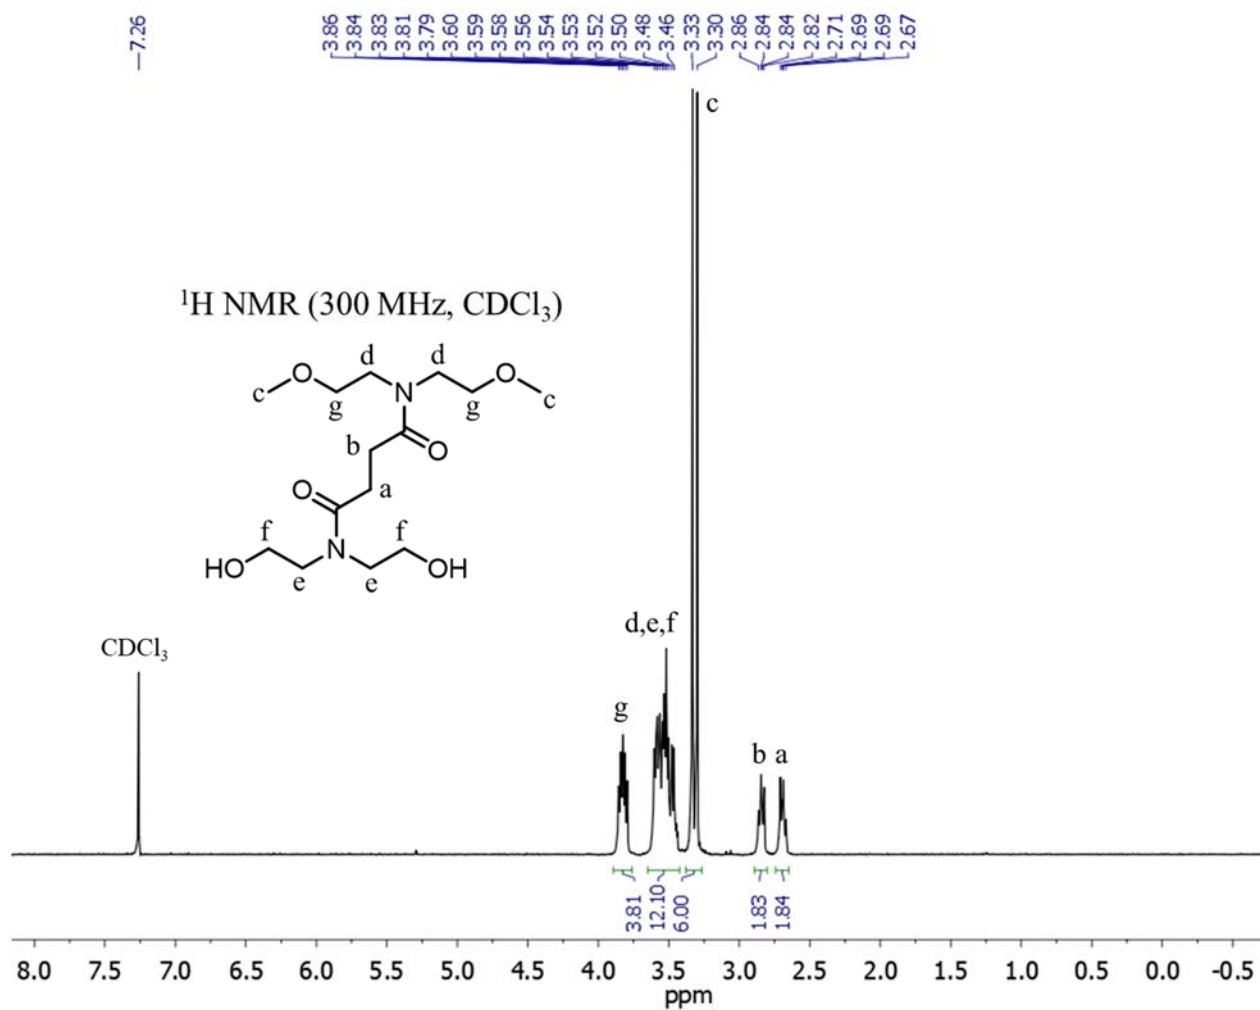

**Figure S2.** <sup>1</sup>H NMR spectrum of **P2** (in CDCl<sub>3</sub>, 300 MHz).

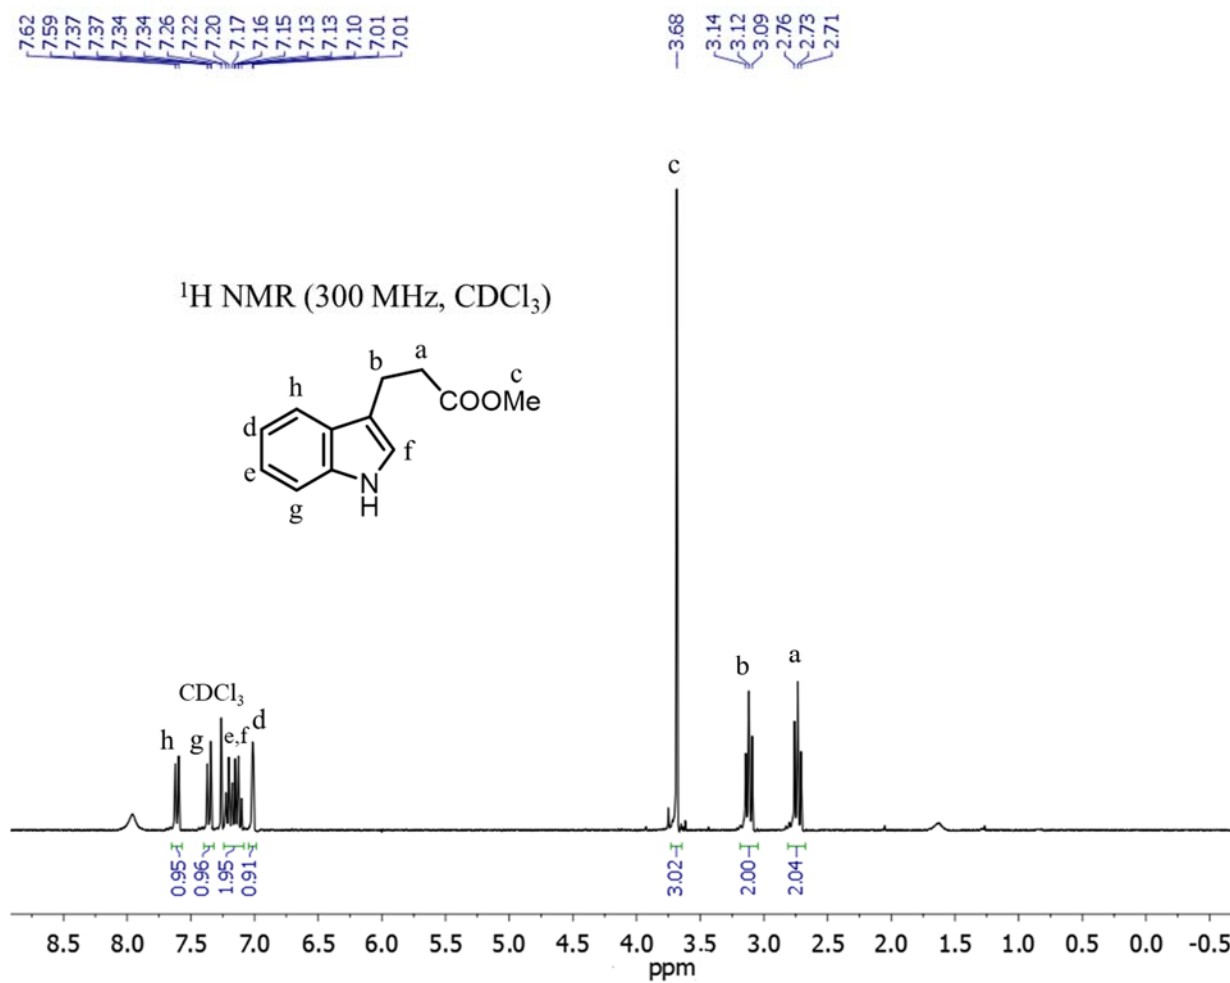

**Figure S3.** <sup>1</sup>H NMR spectrum of **P3** (in CDCl<sub>3</sub>, 300 MHz).

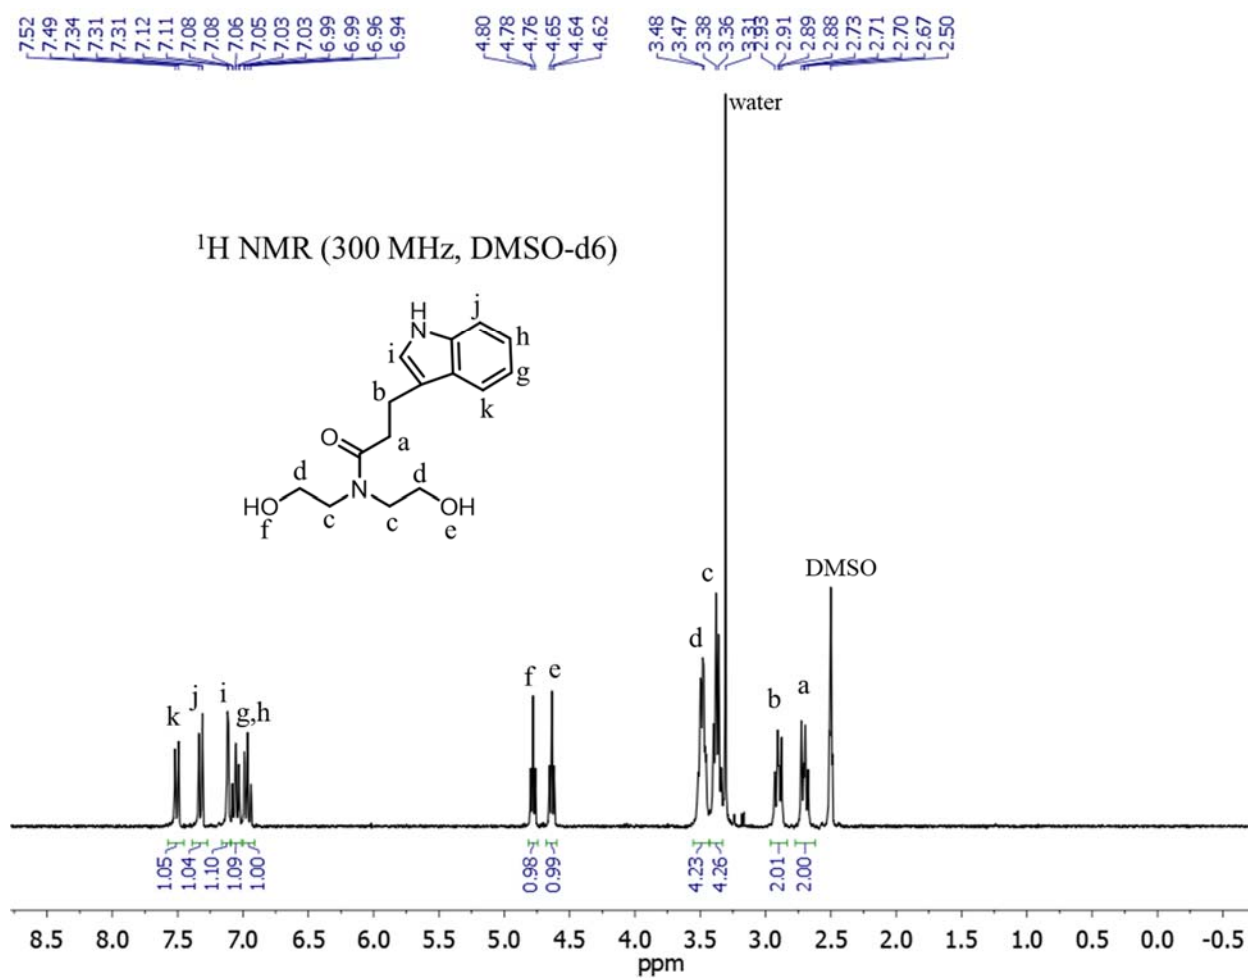

**Figure S4.** <sup>1</sup>H NMR spectrum of **P4** (in DMSO-d<sub>6</sub>, 300 MHz).

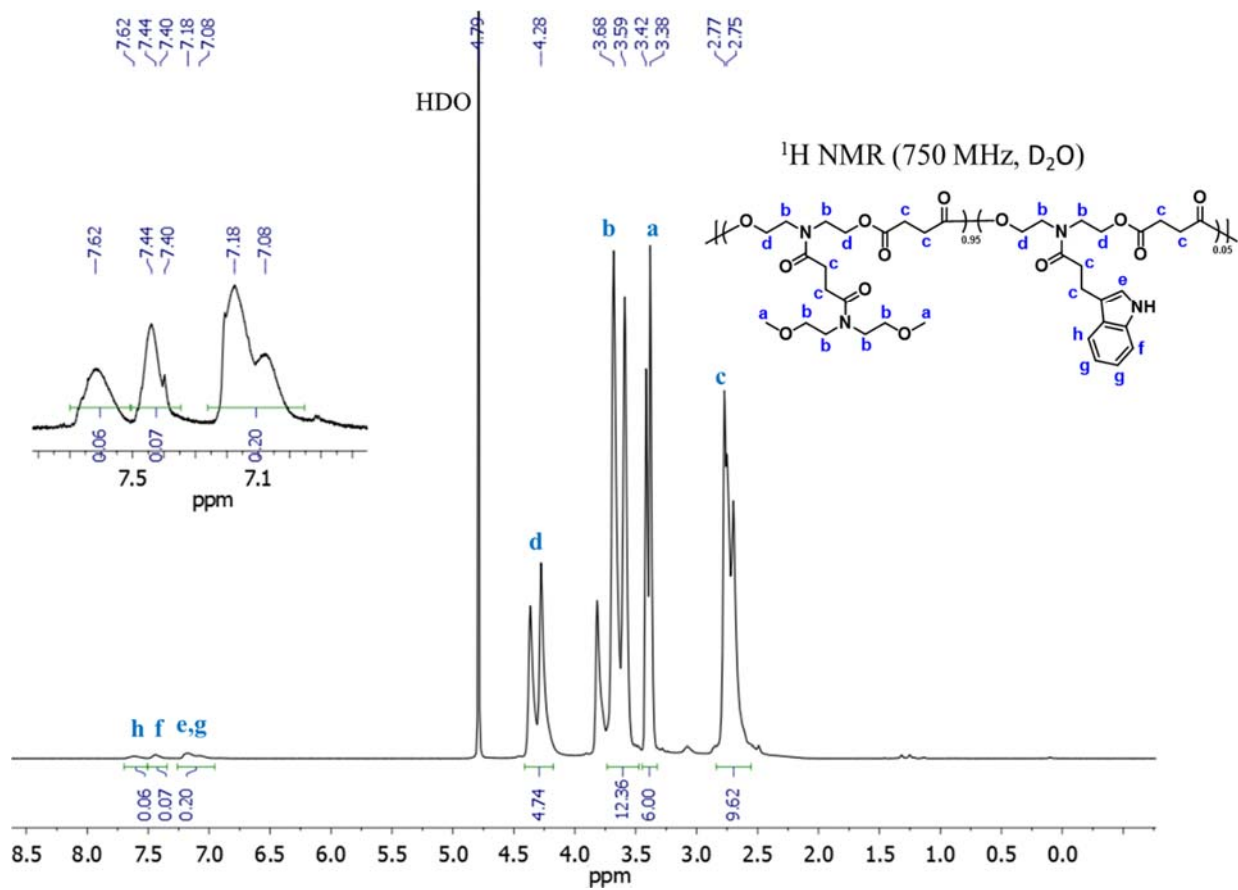

**Figure S5.** <sup>1</sup>H NMR spectrum of p(bMoTrp) (in D<sub>2</sub>O, 750 MHz).



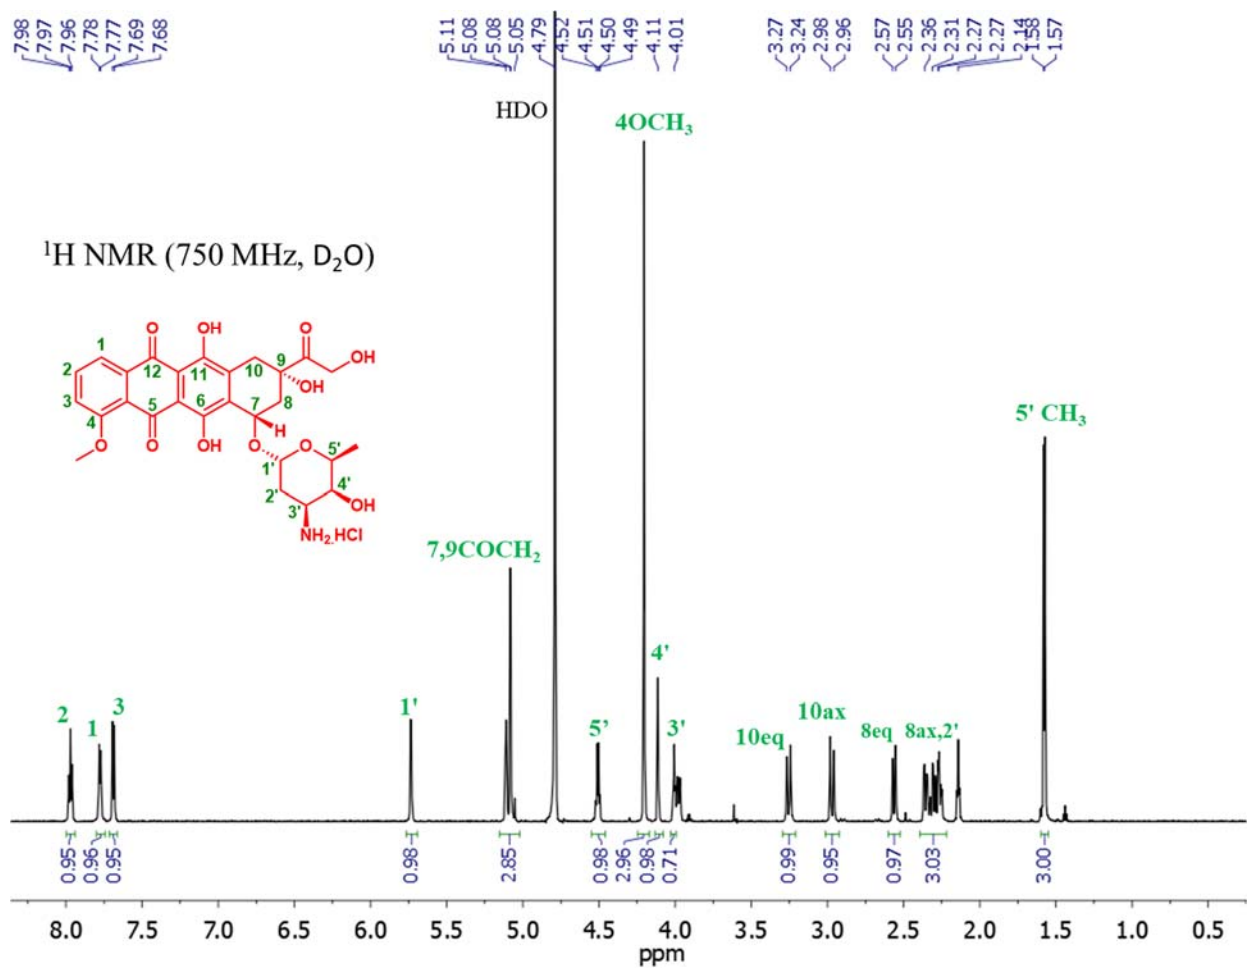

**Figure S6.** <sup>1</sup>H NMR spectrum of Doxorubicin (in D<sub>2</sub>O, 750 MHz).

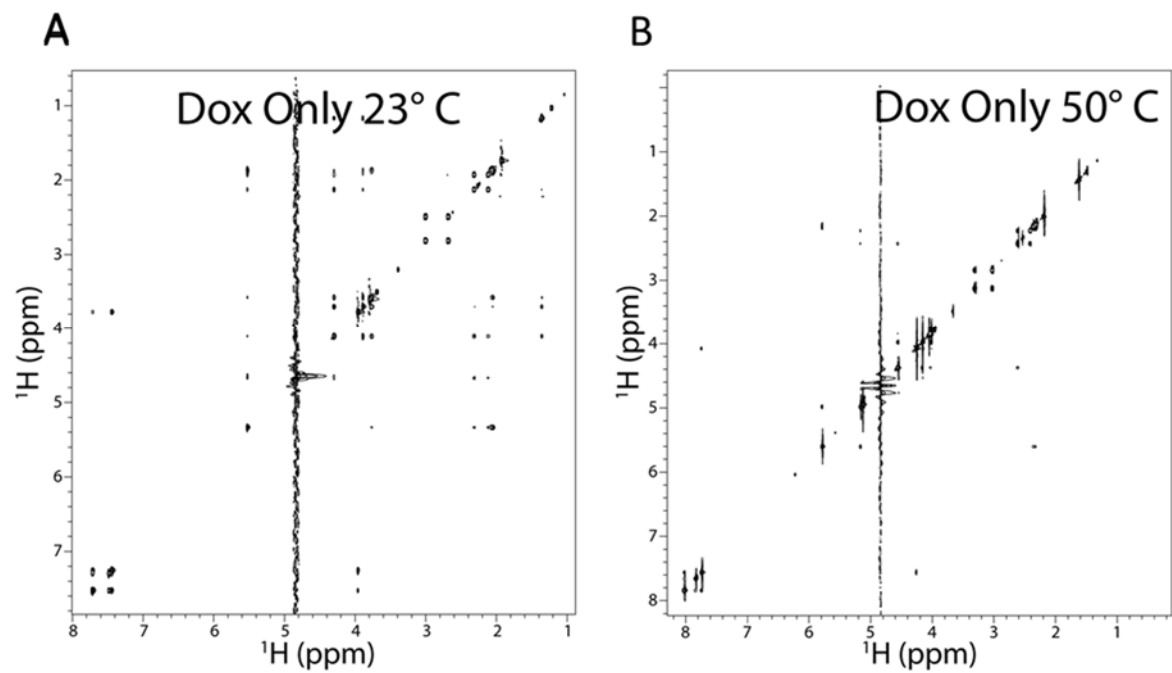

**Figure S7.**  $^1\text{H}$ - $^1\text{H}$  NOESY spectra of Dox at (A) 23 °C and (B) 50 °C. It is clear that there are more cross-peaks present at 23 °C than at 50 °C.
